# Supplementary material
Source: ML conference proceedings conference paper supplement (https://openreview.net/forum?id=bW-gfNJatfXX)
Supplement: supplementary_material [file attachment]

## A APPENDIX

### A.1 IMPLEMENTATION DETAILS

**Intelligent Driver Model (IDM).** IDM is given by Equation 9 and Equation 10. The model describes the acceleration  $\dot{v}_{back}$  of the back agent, as a function of the agent’s velocity  $v_{back}$ , the reference velocity  $v_0$ , the difference between the agent velocity and the velocity of the agent in front  $\Delta v = v_{back} - v_{front}$ , and the following distance  $\varphi = s_{front} + L_{length,front} - s_{back}$ . Here,  $s_{front}$  is the position of the front agent,  $s_{back}$  denotes the position of the back agent, and  $L_{length,front}$  denotes the length of the front agent. The physical interpretation of the parameters are the minimum following time,  $T$ , the minimum following gap,  $s_0$ , the maximum acceleration,  $a$ , the minimum following gap,  $s_0$ , the maximum acceleration,  $a$ , and the comfortable braking deceleration,  $b$ .

$$\dot{v}_{back} = a \left[ 1 - \left( \frac{v_{back}}{v_0} \right)^\delta - \left( \frac{\phi(v_{back}, \Delta v)}{\varphi} \right)^2 \right] \quad (9)$$

$$\phi(v_{back}, \Delta v) = s_0 + v_{back}T + \frac{v_{back}\Delta v}{2\sqrt{ab}} \quad (10)$$

Table 2: **Parameters of IDM.**

| Parameter                      | Value                |
|--------------------------------|----------------------|
| Desired speed $v_0$            | 6 m/s                |
| Time gap $T$                   | 1.0 s                |
| Minimum gap $s_0$              | 2 m                  |
| Acceleration exponent $\delta$ | 4                    |
| Acceleration $a$               | 5.0 m/s <sup>2</sup> |
| Comfortable deceleration $b$   | 5.0 m/s <sup>2</sup> |

**Policy learning parameters.** For Independent Policy Learning (IPL) and single-agent reinforcement learning algorithms, we utilize Soft-Actor-Critic (SAC) (Haarnoja et al., 2018) and Adam optimizer (Kingma & Ba, 2015). Detailed parameters are shown in Table 3.

Table 3: **Hyperparameters of SAC.**

| Parameter                               | Value             |
|-----------------------------------------|-------------------|
| optimizer                               | Adam              |
| actor learning rate                     | $1 \cdot 10^{-4}$ |
| critic learning rate                    | $5 \cdot 10^{-4}$ |
| tune learning rate                      | $1 \cdot 10^{-4}$ |
| discount ( $\gamma$ )                   | 0.9               |
| batch size                              | 128               |
| replay buffer size                      | $10^6$            |
| nonlinearity                            | ReLU              |
| target smoothing coefficient ( $\tau$ ) | 0.005             |
| target update interval                  | 200               |

### A.2 RESULTS ON OUR COORDINATED TRAFFIC FLOW

More results are shown in Table 4, Figure 7, Figure 8, Figure 9, Figure 10, Figure 11, Figure 12, Figure 13, and Figure 14.

### A.3 RESULTS ON ZERO-SHOT TRANSFER.

More results are shown in Table 5, Table 6, Table 7, Table 8.

Table 4: **Quantitative performance of traffic flows.** The table reports the percentage of different metrics in intersection, bottleneck, merge, and roundabout. A “†” indicates our proposed traffic flow.

| Methods   | Intersection      |                   |                  |                  |                  |                   |
|-----------|-------------------|-------------------|------------------|------------------|------------------|-------------------|
|           | Success (↑)       | Collision (↓)     | Off Road (↓)     | Off Route (↓)    | Wrong Lane (↓)   | Speed (↑)         |
| IDM       | 70.4 ± 0.0        | 29.6 ± 0.0        | <b>0.0 ± 0.0</b> | <b>0.0 ± 0.0</b> | <b>0.0 ± 0.0</b> | 42.1 ± 0.0        |
| FLOW      | 79.6 ± 0.5        | 15.9 ± 0.6        | 2.0 ± 0.2        | 1.2 ± 0.1        | <b>0.0 ± 0.0</b> | 47.4 ± 0.2        |
| CoPO      | 79.6 ± 0.3        | 17.6 ± 0.4        | 1.3 ± 0.1        | 1.4 ± 0.1        | 0.1 ± 0.1        | 46.8 ± 0.1        |
| FailMaker | 45.3 ± 0.3        | 52.5 ± 0.3        | <b>0.0 ± 0.0</b> | <b>0.0 ± 0.0</b> | <b>0.0 ± 0.0</b> | 28.7 ± 0.1        |
| Ours†     | <b>86.9 ± 0.5</b> | <b>9.0 ± 0.4</b>  | 2.8 ± 0.1        | 1.2 ± 0.1        | 0.2 ± 0.1        | <b>51.0 ± 0.2</b> |
| Methods   | Bottleneck        |                   |                  |                  |                  |                   |
|           | Success (↑)       | Collision (↓)     | Off Road (↓)     | Off Route (↓)    | Wrong Lane (↓)   | Speed (↑)         |
| IDM       | 67.0 ± 0.0        | 33.0 ± 0.0        | <b>0.0 ± 0.0</b> | <b>0.0 ± 0.0</b> | <b>0.0 ± 0.0</b> | 49.1 ± 0.0        |
| FLOW      | 76.2 ± 0.5        | 9.8 ± 0.4         | 14.3 ± 0.6       | <b>0.0 ± 0.0</b> | <b>0.0 ± 0.0</b> | 75.1 ± 0.3        |
| CoPO      | 80.3 ± 0.6        | <b>9.3 ± 0.7</b>  | 11.4 ± 0.4       | <b>0.0 ± 0.0</b> | <b>0.0 ± 0.0</b> | 74.5 ± 0.3        |
| FailMaker | 21.3 ± 0.2        | 78.6 ± 0.1        | 0.1 ± 0.0        | <b>0.0 ± 0.0</b> | <b>0.0 ± 0.0</b> | 29.0 ± 0.2        |
| Ours†     | <b>83.4 ± 0.4</b> | 9.4 ± 0.3         | 7.3 ± 0.3        | <b>0.0 ± 0.0</b> | <b>0.0 ± 0.0</b> | <b>76.4 ± 0.1</b> |
| Methods   | Merge             |                   |                  |                  |                  |                   |
|           | Success (↑)       | Collision (↓)     | Off Road (↓)     | Off Route (↓)    | Wrong Lane (↓)   | Speed (↑)         |
| IDM       | 60.0 ± 0.0        | 40.0 ± 0.0        | <b>0.0 ± 0.0</b> | <b>0.0 ± 0.0</b> | <b>0.0 ± 0.0</b> | 46.9 ± 0.0        |
| FLOW      | 66.2 ± 0.4        | 25.4 ± 0.5        | 8.5 ± 0.2        | <b>0.0 ± 0.0</b> | <b>0.0 ± 0.0</b> | 55.1 ± 0.2        |
| CoPO      | 69.3 ± 0.5        | 26.9 ± 0.6        | 3.8 ± 0.3        | <b>0.0 ± 0.0</b> | <b>0.0 ± 0.0</b> | 54.9 ± 0.2        |
| FailMaker | 16.0 ± 0.2        | 80.9 ± 0.2        | 3.4 ± 0.2        | <b>0.0 ± 0.0</b> | <b>0.0 ± 0.0</b> | 16.2 ± 0.1        |
| Ours†     | <b>83.1 ± 0.5</b> | <b>16.2 ± 0.5</b> | 0.6 ± 0.1        | 0.2 ± 0.1        | <b>0.0 ± 0.0</b> | <b>60.0 ± 0.2</b> |
| Methods   | Roundabout        |                   |                  |                  |                  |                   |
|           | Success (↑)       | Collision (↓)     | Off Road (↓)     | Off Route (↓)    | Wrong Lane (↓)   | Speed (↑)         |
| IDM       | 73.6 ± 0.0        | 26.4 ± 0.0        | <b>0.0 ± 0.0</b> | <b>0.0 ± 0.0</b> | <b>0.0 ± 0.0</b> | 38.1 ± 0.0        |
| FLOW      | 72.7 ± 0.6        | 22.4 ± 0.4        | 4.8 ± 0.2        | <b>0.0 ± 0.0</b> | 0.1 ± 0.1        | 39.2 ± 0.1        |
| CoPO      | 81.2 ± 0.6        | 14.3 ± 0.5        | 4.0 ± 0.2        | <b>0.0 ± 0.0</b> | 0.5 ± 0.1        | 39.0 ± 0.1        |
| FailMaker | 21.3 ± 0.3        | 77.6 ± 0.3        | 0.5 ± 0.0        | <b>0.0 ± 0.0</b> | 0.6 ± 0.1        | 15.7 ± 0.1        |
| Ours†     | <b>84.6 ± 0.5</b> | <b>11.5 ± 0.3</b> | 3.6 ± 0.3        | 0.1 ± 0.0        | 0.5 ± 0.1        | <b>42.2 ± 0.1</b> |

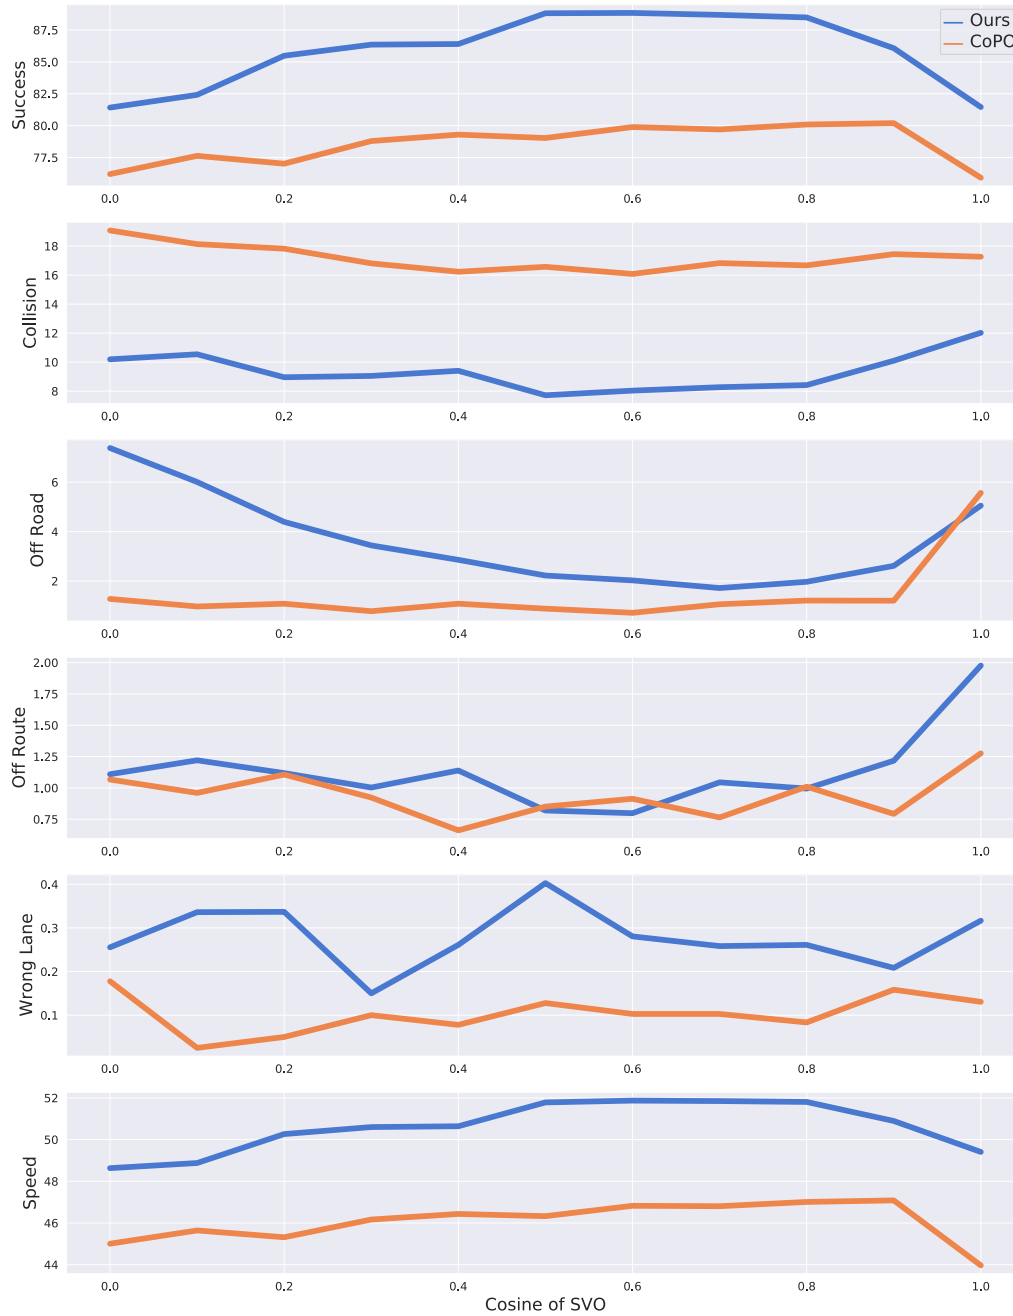

Figure 7: The performance of CoPO and our traffic flow in intersection.

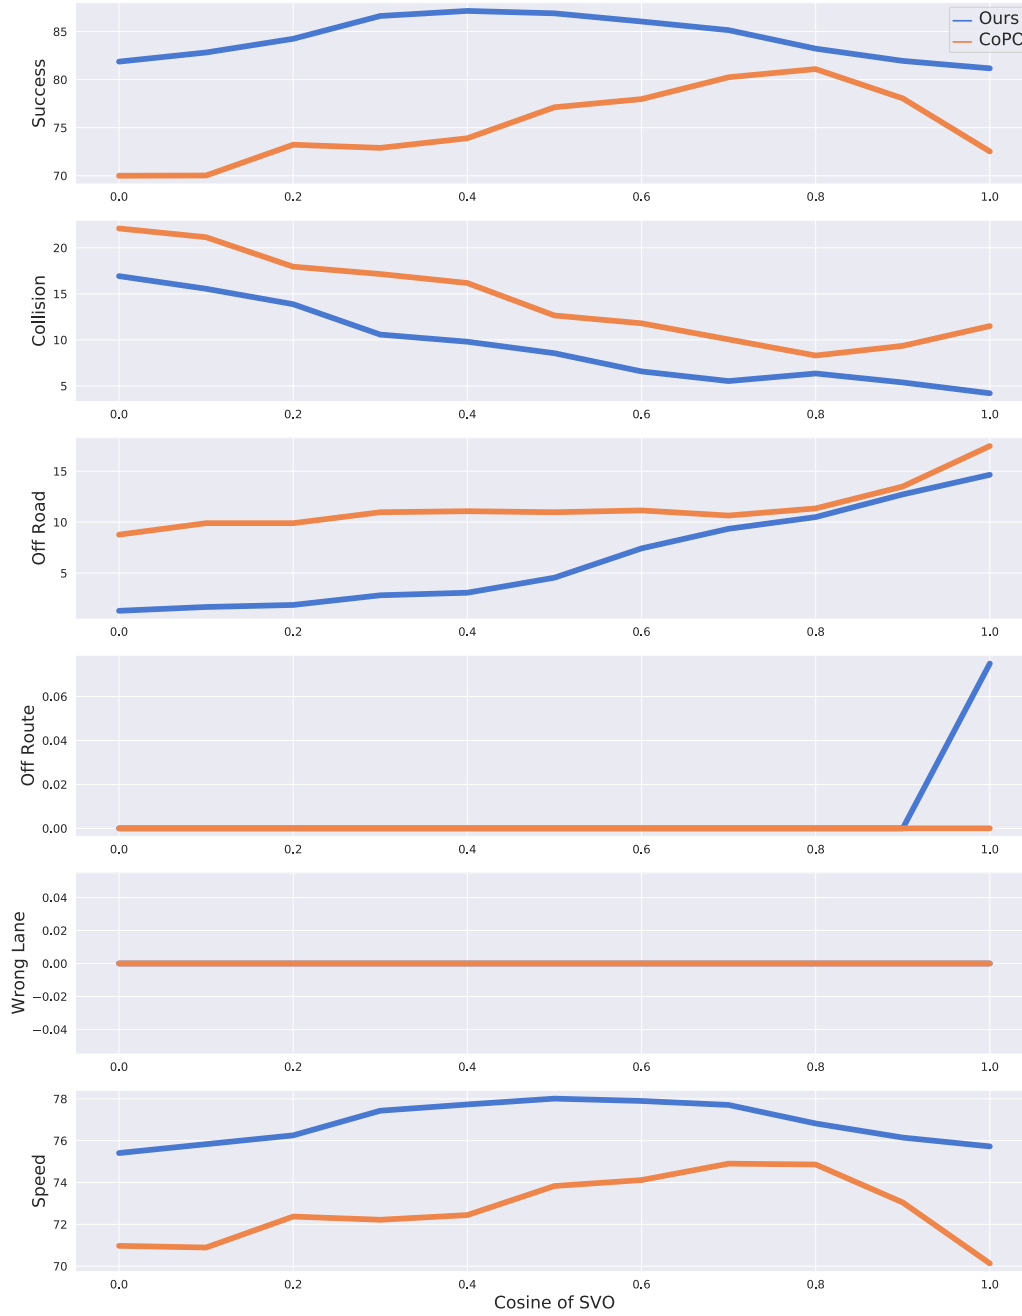

Figure 8: The performance of CoPO and our traffic flow in bottleneck.

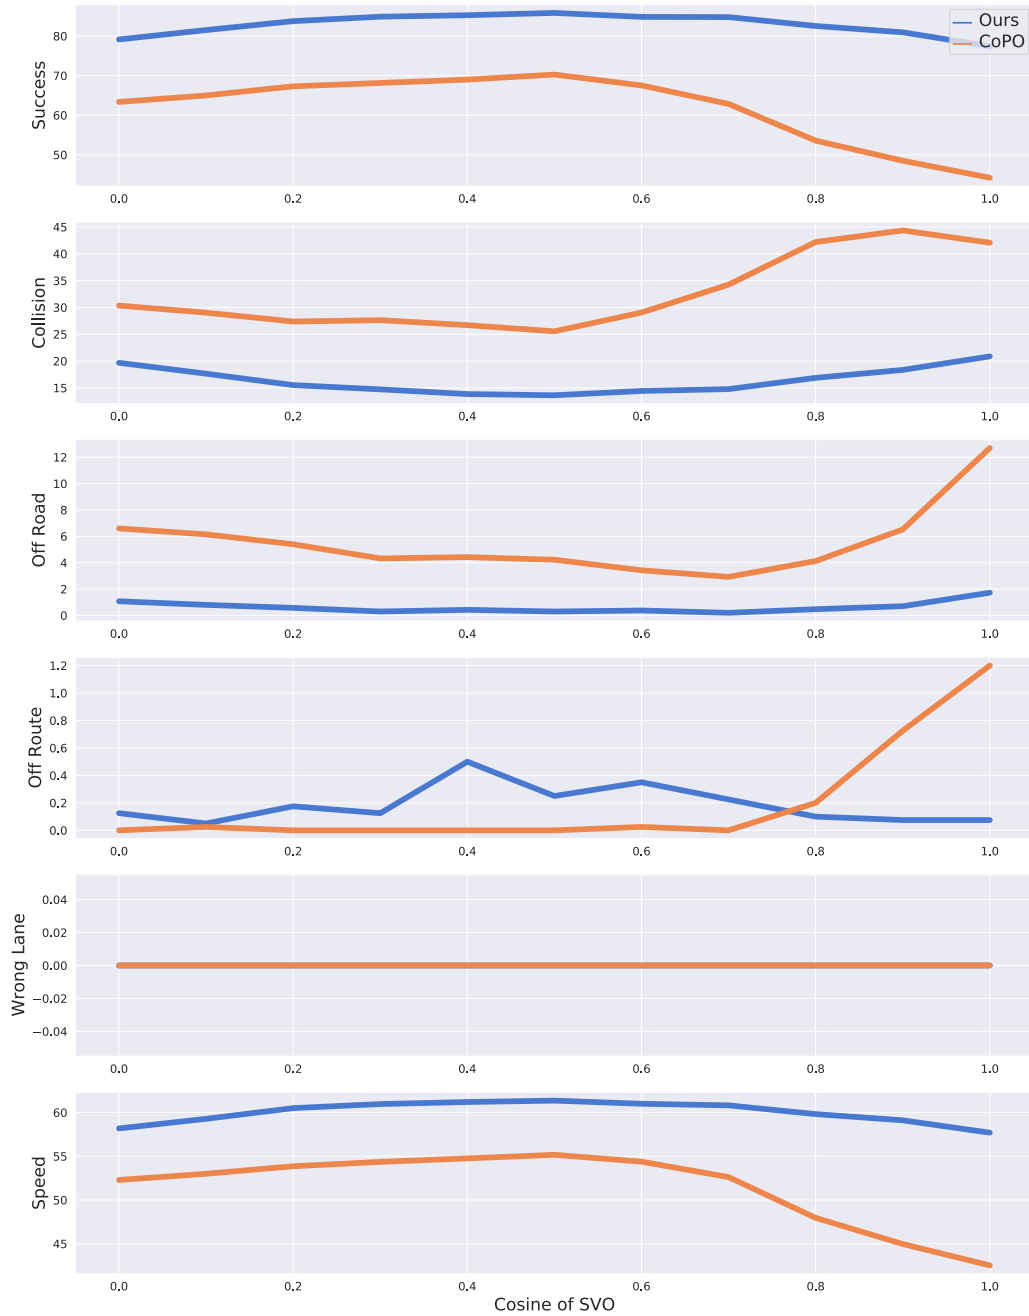

Figure 9: The performance of CoPO and our traffic flow in merge.

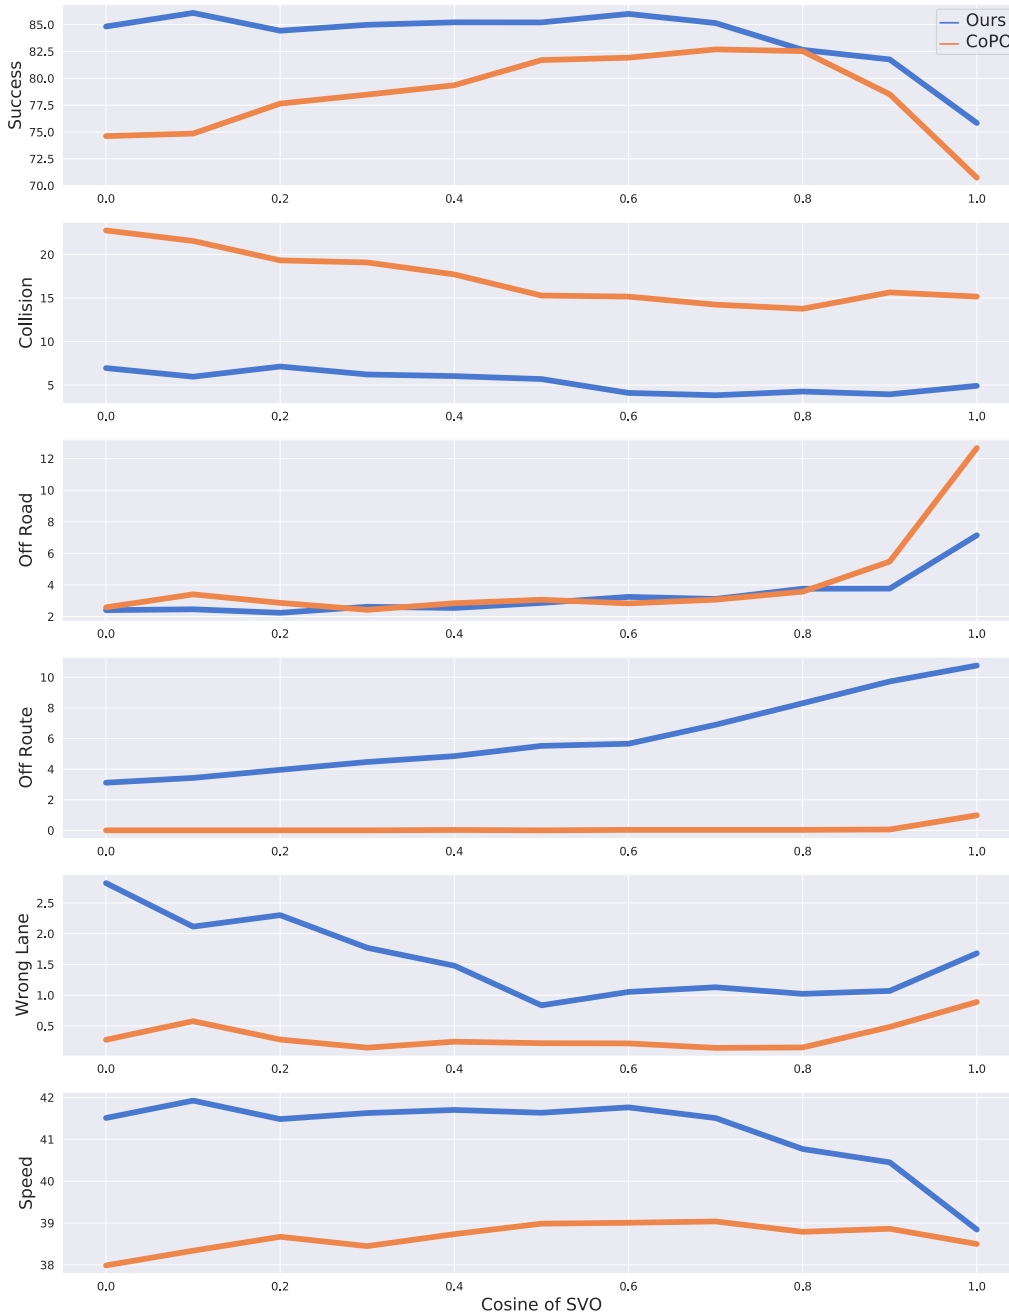

Figure 10: The performance of CoPO and our traffic flow in roundabout.

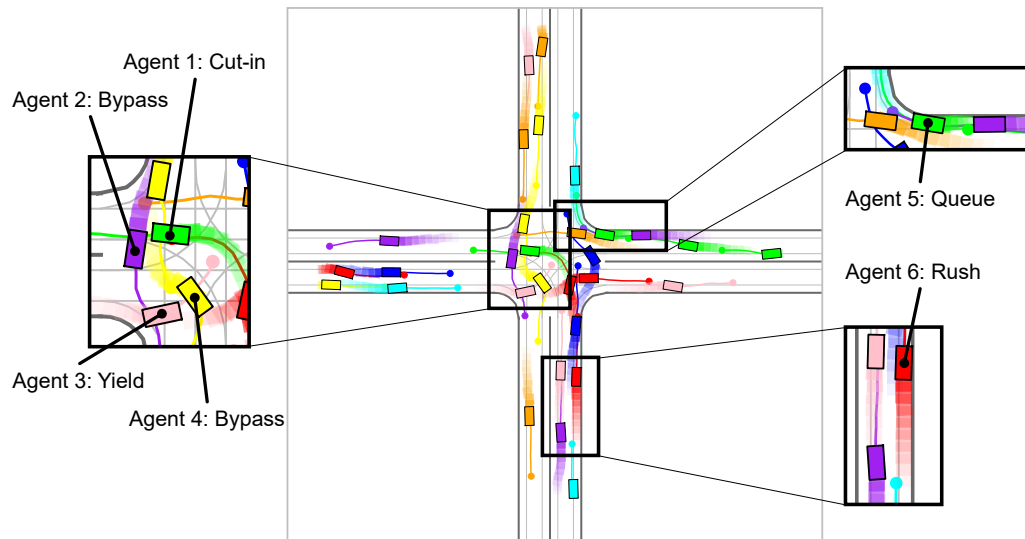

Figure 11: Coordinated behaviors in intersection.

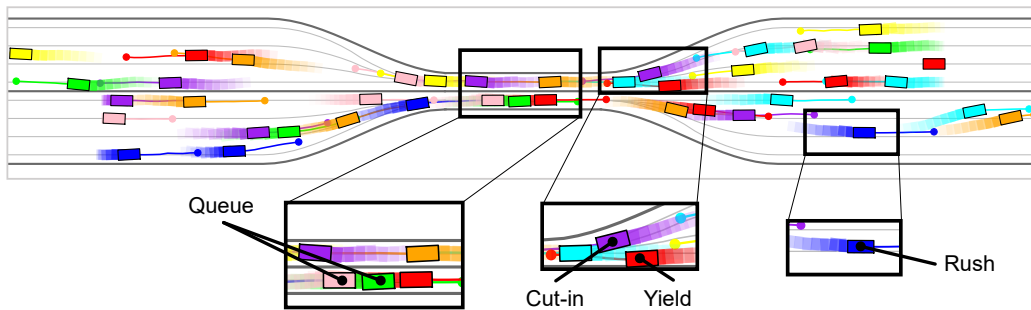

Figure 12: Coordinated behaviors in bottleneck.

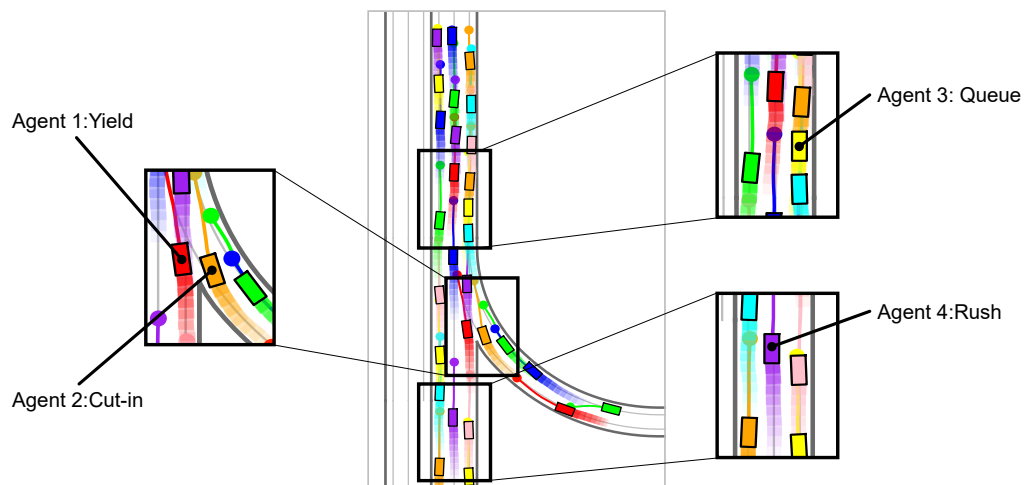

Figure 13: Coordinated behaviors in merge.

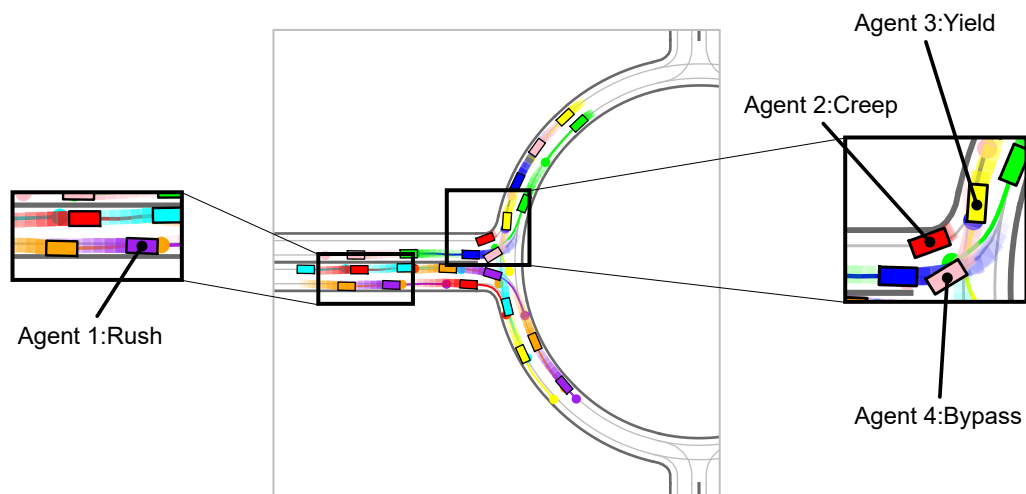

Figure 14: Coordinated behaviors in roundabout.



Table 5: **Zero-shot transfer performance in intersection.** Each subtable stores results of different driving policies in the same traffic flow. A “†” indicates our proposed method.

| Evaluate in<br>IDM | Intersection |               |              |               |                |             |
|--------------------|--------------|---------------|--------------|---------------|----------------|-------------|
|                    | Success (↑)  | Collision (↓) | Off Road (↓) | Off Route (↓) | Wrong Lane (↓) | Speed (↑)   |
| VRL/IDM            | 79.5         | 6.0           | 2.0          | 0.0           | 0.0            | 47.1        |
| VRL/FLOW           | 67.0         | 30.5          | <b>0.5</b>   | 0.5           | 0.5            | 39.5        |
| VRL/CoPO           | 69.0         | 27.0          | <b>0.5</b>   | <b>0.0</b>    | <b>0.0</b>     | <b>43.0</b> |
| eRARL              | 22.5         | <b>20.5</b>   | 19.5         | 11.0          | <b>0.0</b>     | 25.2        |
| VRL/Ours†          | 69.0         | 28.5          | 3.5          | 2.0           | <b>0.0</b>     | 40.8        |
| iRARL†             | <b>71.5</b>  | 21.5          | 6.0          | 1.0           | <b>0.0</b>     | 42.1        |

  

| Evaluate in<br>FLOW | Intersection |               |              |               |                |             |
|---------------------|--------------|---------------|--------------|---------------|----------------|-------------|
|                     | Success (↑)  | Collision (↓) | Off Road (↓) | Off Route (↓) | Wrong Lane (↓) | Speed (↑)   |
| VRL/IDM             | 65.5         | 18.5          | 13.0         | <b>1.5</b>    | 0.5            | 42.8        |
| VRL/FLOW            | 87.5         | 6.5           | 1.5          | 0.0           | 0.0            | 51.5        |
| VRL/CoPO            | 76.0         | 12.0          | <b>2.0</b>   | 3.0           | <b>0.0</b>     | 46.5        |
| eRARL               | 26.0         | 13.5          | 13.0         | 16.0          | 0.5            | 25.7        |
| VRL/Ours†           | 79.0         | 11.0          | <b>2.0</b>   | 4.5           | <b>0.0</b>     | 47.9        |
| iRARL†              | <b>83.5</b>  | <b>8.0</b>    | <b>2.0</b>   | 3.0           | 0.5            | <b>49.7</b> |

  

| Evaluate in<br>CoPO | Intersection |               |              |               |                |             |
|---------------------|--------------|---------------|--------------|---------------|----------------|-------------|
|                     | Success (↑)  | Collision (↓) | Off Road (↓) | Off Route (↓) | Wrong Lane (↓) | Speed (↑)   |
| VRL/IDM             | 69.5         | 20.0          | 8.0          | 1.0           | 0.5            | 45.0        |
| VRL/FLOW            | 75.5         | 20.0          | 1.5          | <b>0.0</b>    | <b>0.0</b>     | 46.1        |
| VRL/CoPO            | 81.5         | 16.0          | 1.0          | 0.0           | 0.0            | 48.7        |
| eRARL               | 25.5         | <b>11.5</b>   | 15.5         | 14.5          | 0.5            | 26.0        |
| VRL/Ours†           | 74.5         | 19.0          | 1.0          | 2.0           | <b>0.0</b>     | 45.8        |
| iRARL†              | <b>79.5</b>  | 16.5          | <b>0.0</b>   | 1.0           | <b>0.0</b>     | <b>47.7</b> |

  

| Evaluate in<br>FailMaker | Intersection |               |              |               |                |             |
|--------------------------|--------------|---------------|--------------|---------------|----------------|-------------|
|                          | Success (↑)  | Collision (↓) | Off Road (↓) | Off Route (↓) | Wrong Lane (↓) | Speed (↑)   |
| VRL/IDM                  | <b>55.0</b>  | <b>22.5</b>   | 22.0         | <b>0.0</b>    | 0.5            | <b>37.3</b> |
| VRL/FLOW                 | 52.0         | 37.0          | 12.0         | <b>0.0</b>    | <b>0.0</b>     | 36.0        |
| VRL/CoPO                 | 51.0         | 43.5          | <b>4.0</b>   | 1.0           | 0.5            | 34.7        |
| eRARL                    | 26.5         | 11.5          | 17.5         | 14.5          | 0.0            | 25.9        |
| VRL/Ours†                | 51.5         | 33.0          | 16.5         | 1.5           | <b>0.0</b>     | 36.5        |
| iRARL†                   | 51.0         | 40.5          | 8.0          | <b>0.0</b>    | <b>0.0</b>     | 35.9        |

  

| Evaluate in<br>Ours wo Adv | Intersection |               |              |               |                |             |
|----------------------------|--------------|---------------|--------------|---------------|----------------|-------------|
|                            | Success (↑)  | Collision (↓) | Off Road (↓) | Off Route (↓) | Wrong Lane (↓) | Speed (↑)   |
| VRL/IDM                    | 77.0         | <b>10.0</b>   | 11.0         | 1.0           | <b>0.0</b>     | 47.1        |
| VRL/FLOW                   | 84.0         | 13.5          | <b>1.0</b>   | <b>0.5</b>    | 0.5            | 50.1        |
| VRL/CoPO                   | 81.5         | 14.5          | <b>1.0</b>   | 2.0           | <b>0.0</b>     | 48.8        |
| eRARL                      | 21.5         | 12.5          | 21.0         | 15.0          | 0.5            | 24.9        |
| VRL/Ours†                  | 87.0         | 7.0           | 1.5          | 1.5           | 0.5            | 51.9        |
| iRARL†                     | <b>85.5</b>  | 11.0          | <b>1.0</b>   | <b>0.5</b>    | <b>0.0</b>     | <b>50.9</b> |

  

| Evaluate in<br>Ours | Intersection |               |              |               |                |             |
|---------------------|--------------|---------------|--------------|---------------|----------------|-------------|
|                     | Success (↑)  | Collision (↓) | Off Road (↓) | Off Route (↓) | Wrong Lane (↓) | Speed (↑)   |
| VRL/IDM             | 74.5         | 14.5          | 7.5          | 2.5           | <b>0.0</b>     | 45.9        |
| VRL/FLOW            | 82.5         | 15.0          | 2.0          | <b>0.0</b>    | <b>0.0</b>     | 49.6        |
| VRL/CoPO            | 78.5         | 18.5          | <b>1.5</b>   | 1.0           | <b>0.0</b>     | 47.5        |
| eRARL               | 24.0         | 12.5          | 15.5         | 18.0          | 0.5            | 25.3        |
| VRL/Ours†           | <b>85.0</b>  | <b>9.0</b>    | 3.0          | 1.0           | 0.5            | <b>50.8</b> |
| iRARL†              | 86.0         | 10.5          | 0.5          | 1.5           | 0.0            | 51.4        |

Table 6: **Zero-shot transfer performance in bottleneck.** Each subtable stores results of different driving policies in the same traffic flow. A “†” indicates our proposed method.

| Evaluate in<br>IDM | Bottleneck  |               |              |               |                |           |
|--------------------|-------------|---------------|--------------|---------------|----------------|-----------|
|                    | Success (↑) | Collision (↓) | Off Road (↓) | Off Route (↓) | Wrong Lane (↓) | Speed (↑) |
| VRL/IDM            | 91.5        | 6.0           | 2.5          | 0.0           | 0.0            | 72.8      |
| VRL/FLOW           | 53.0        | 25.5          | 19.5         | 2.5           | 0.0            | 51.7      |
| VRL/CoPO           | 64.5        | 24.0          | 10.5         | 2.5           | 0.0            | 59.6      |
| eRARL              | 50.0        | 10.0          | 37.5         | 3.0           | 0.0            | 33.9      |
| VRL/Ours†          | 67.0        | 20.5          | 12.5         | 0.0           | 0.0            | 55.8      |
| iRARL†             | 74.5        | 21.0          | 5.5          | 0.0           | 0.0            | 57.6      |

  

| Evaluate in<br>FLOW | Bottleneck  |               |              |               |                |           |
|---------------------|-------------|---------------|--------------|---------------|----------------|-----------|
|                     | Success (↑) | Collision (↓) | Off Road (↓) | Off Route (↓) | Wrong Lane (↓) | Speed (↑) |
| VRL/IDM             | 51.0        | 24.0          | 26.5         | 0.5           | 0.0            | 54.8      |
| VRL/FLOW            | 79.0        | 18.5          | 2.0          | 0.5           | 0.0            | 76.1      |
| VRL/CoPO            | 60.5        | 27.5          | 12.5         | 0.0           | 0.0            | 65.5      |
| eRARL               | 42.0        | 18.5          | 39.5         | 0.0           | 0.0            | 25.6      |
| VRL/Ours†           | 72.5        | 24.0          | 4.5          | 0.0           | 0.0            | 68.7      |
| iRARL†              | 73.0        | 25.5          | 2.0          | 0.0           | 0.0            | 68.4      |

  

| Evaluate in<br>CoPO | Bottleneck  |               |              |               |                |           |
|---------------------|-------------|---------------|--------------|---------------|----------------|-----------|
|                     | Success (↑) | Collision (↓) | Off Road (↓) | Off Route (↓) | Wrong Lane (↓) | Speed (↑) |
| VRL/IDM             | 48.5        | 16.5          | 33.0         | 2.0           | 0.0            | 57.2      |
| VRL/FLOW            | 61.0        | 6.5           | 33.0         | 0.0           | 0.0            | 64.6      |
| VRL/CoPO            | 89.0        | 9.0           | 1.5          | 0.5           | 0.0            | 81.8      |
| eRARL               | 51.0        | 11.0          | 34.5         | 3.5           | 0.0            | 35.1      |
| VRL/Ours†           | 65.0        | 30.5          | 5.5          | 0.0           | 0.0            | 67.2      |
| iRARL†              | 74.0        | 25.5          | 0.5          | 0.0           | 0.0            | 71.0      |

  

| Evaluate in<br>FailMaker | Bottleneck  |               |              |               |                |           |
|--------------------------|-------------|---------------|--------------|---------------|----------------|-----------|
|                          | Success (↑) | Collision (↓) | Off Road (↓) | Off Route (↓) | Wrong Lane (↓) | Speed (↑) |
| VRL/IDM                  | 20.5        | 59.0          | 26.0         | 0.0           | 0.0            | 34.5      |
| VRL/FLOW                 | 4.5         | 94.0          | 3.0          | 0.0           | 0.0            | 24.2      |
| VRL/CoPO                 | 6.5         | 88.5          | 6.5          | 0.0           | 0.0            | 27.5      |
| eRARL                    | 38.0        | 23.0          | 38.5         | 0.5           | 0.0            | 26.1      |
| VRL/Ours†                | 2.5         | 87.5          | 13.5         | 0.0           | 0.0            | 24.3      |
| iRARL†                   | 4.5         | 94.0          | 2.0          | 0.0           | 0.0            | 24.1      |

  

| Evaluate in<br>Ours wo Adv | Bottleneck  |               |              |               |                |           |
|----------------------------|-------------|---------------|--------------|---------------|----------------|-----------|
|                            | Success (↑) | Collision (↓) | Off Road (↓) | Off Route (↓) | Wrong Lane (↓) | Speed (↑) |
| VRL/IDM                    | 52.5        | 26.0          | 21.0         | 0.5           | 0.0            | 58.3      |
| VRL/FLOW                   | 75.5        | 19.5          | 4.5          | 0.5           | 0.0            | 74.6      |
| VRL/CoPO                   | 71.5        | 13.5          | 15.5         | 1.0           | 0.0            | 70.9      |
| eRARL                      | 36.0        | 23.5          | 42.0         | 0.5           | 0.0            | 26.6      |
| VRL/Ours†                  | 91.0        | 4.0           | 5.0          | 0.0           | 0.0            | 81.3      |
| iRARL†                     | 89.5        | 8.5           | 2.0          | 0.0           | 0.0            | 79.6      |

  

| Evaluate in<br>Ours | Bottleneck  |               |              |               |                |           |
|---------------------|-------------|---------------|--------------|---------------|----------------|-----------|
|                     | Success (↑) | Collision (↓) | Off Road (↓) | Off Route (↓) | Wrong Lane (↓) | Speed (↑) |
| VRL/IDM             | 50.5        | 27.0          | 22.0         | 0.5           | 0.0            | 57.0      |
| VRL/FLOW            | 73.5        | 24.0          | 2.0          | 0.5           | 0.0            | 73.8      |
| VRL/CoPO            | 69.5        | 11.0          | 19.0         | 1.0           | 0.0            | 69.9      |
| eRARL               | 36.5        | 19.0          | 43.5         | 1.0           | 0.0            | 27.7      |
| VRL/Ours†           | 85.0        | 7.0           | 8.0          | 0.0           | 0.0            | 78.3      |
| iRARL†              | 88.5        | 11.5          | 0.0          | 0.0           | 0.0            | 79.8      |

Table 7: **Zero-shot transfer performance in merge.** Each subtable stores results of different driving policies in the same traffic flow. A “†” indicates our proposed method.

| Evaluate in<br>IDM | Merge       |               |              |               |                |           |
|--------------------|-------------|---------------|--------------|---------------|----------------|-----------|
|                    | Success (↑) | Collision (↓) | Off Road (↓) | Off Route (↓) | Wrong Lane (↓) | Speed (↑) |
| VRL/IDM            | 92.0        | 6.0           | 2.0          | 0.0           | 0.0            | 62.3      |
| VRL/FLOW           | 41.5        | 55.5          | 7.5          | 0.5           | 0.0            | 29.1      |
| VRL/CoPO           | 54.5        | 19.0          | 22.5         | 9.0           | 0.0            | 38.0      |
| eRARL              | 66.5        | 5.0           | 14.5         | 14.0          | 0.0            | 45.9      |
| VRL/Ours†          | 67.5        | 18.5          | 14.5         | 0.0           | 0.0            | 43.6      |
| iRARL†             | 85.0        | 15.0          | 0.0          | 0.0           | 0.0            | 53.2      |

  

| Evaluate in<br>FLOW | Merge       |               |              |               |                |           |
|---------------------|-------------|---------------|--------------|---------------|----------------|-----------|
|                     | Success (↑) | Collision (↓) | Off Road (↓) | Off Route (↓) | Wrong Lane (↓) | Speed (↑) |
| VRL/IDM             | 35.0        | 38.0          | 27.5         | 0.0           | 0.0            | 40.5      |
| VRL/FLOW            | 69.5        | 25.0          | 5.5          | 0.0           | 0.0            | 56.0      |
| VRL/CoPO            | 52.0        | 35.0          | 12.0         | 1.0           | 0.0            | 48.2      |
| eRARL               | 17.0        | 40.5          | 33.5         | 9.5           | 0.0            | 24.2      |
| VRL/Ours†           | 62.5        | 33.5          | 4.0          | 0.0           | 0.0            | 54.5      |
| iRARL†              | 67.5        | 21.5          | 11.0         | 0.0           | 0.0            | 56.0      |

  

| Evaluate in<br>CoPO | Merge       |               |              |               |                |           |
|---------------------|-------------|---------------|--------------|---------------|----------------|-----------|
|                     | Success (↑) | Collision (↓) | Off Road (↓) | Off Route (↓) | Wrong Lane (↓) | Speed (↑) |
| VRL/IDM             | 36.5        | 44.5          | 19.0         | 0.0           | 0.0            | 40.0      |
| VRL/FLOW            | 50.0        | 44.0          | 5.5          | 0.5           | 0.0            | 46.6      |
| VRL/CoPO            | 70.5        | 24.5          | 5.0          | 0.0           | 0.0            | 55.4      |
| eRARL               | 17.0        | 39.0          | 34.0         | 10.0          | 0.0            | 23.5      |
| VRL/Ours†           | 57.0        | 37.5          | 5.5          | 0.0           | 0.0            | 49.9      |
| iRARL†              | 59.5        | 40.0          | 0.5          | 0.0           | 0.0            | 52.0      |

  

| Evaluate in<br>FailMaker | Merge       |               |              |               |                |           |
|--------------------------|-------------|---------------|--------------|---------------|----------------|-----------|
|                          | Success (↑) | Collision (↓) | Off Road (↓) | Off Route (↓) | Wrong Lane (↓) | Speed (↑) |
| VRL/IDM                  | 9.0         | 74.5          | 18.0         | 0.0           | 0.0            | 15.1      |
| VRL/FLOW                 | 9.0         | 81.0          | 11.5         | 0.0           | 0.0            | 17.5      |
| VRL/CoPO                 | 10.0        | 83.5          | 10.0         | 0.0           | 0.0            | 19.2      |
| eRARL                    | 19.5        | 37.5          | 39.5         | 6.5           | 0.0            | 21.6      |
| VRL/Ours†                | 8.5         | 88.0          | 4.0          | 0.0           | 0.0            | 16.8      |
| iRARL†                   | 12.0        | 78.5          | 11.0         | 0.0           | 0.0            | 18.5      |

  

| Evaluate in<br>Ours wo Adv | Merge       |               |              |               |                |           |
|----------------------------|-------------|---------------|--------------|---------------|----------------|-----------|
|                            | Success (↑) | Collision (↓) | Off Road (↓) | Off Route (↓) | Wrong Lane (↓) | Speed (↑) |
| VRL/IDM                    | 65.0        | 16.0          | 19.0         | 0.0           | 0.0            | 51.3      |
| VRL/FLOW                   | 71.5        | 21.0          | 7.5          | 0.0           | 0.0            | 55.0      |
| VRL/CoPO                   | 70.0        | 24.5          | 5.5          | 0.5           | 0.0            | 55.1      |
| eRARL                      | 18.5        | 29.0          | 47.5         | 6.5           | 0.0            | 27.6      |
| VRL/Ours†                  | 84.5        | 14.0          | 1.5          | 0.0           | 0.0            | 60.7      |
| iRARL†                     | 83.5        | 12.5          | 3.5          | 0.5           | 0.0            | 61.2      |

  

| Evaluate in<br>Ours | Merge       |               |              |               |                |           |
|---------------------|-------------|---------------|--------------|---------------|----------------|-----------|
|                     | Success (↑) | Collision (↓) | Off Road (↓) | Off Route (↓) | Wrong Lane (↓) | Speed (↑) |
| VRL/IDM             | 64.5        | 18.0          | 17.5         | 0.0           | 0.0            | 51.1      |
| VRL/FLOW            | 69.5        | 22.5          | 8.0          | 0.0           | 0.0            | 54.1      |
| VRL/CoPO            | 66.0        | 23.5          | 10.5         | 0.5           | 0.0            | 53.4      |
| eRARL               | 18.5        | 25.0          | 50.5         | 7.0           | 0.0            | 27.2      |
| VRL/Ours†           | 83.5        | 15.0          | 1.5          | 0.0           | 0.0            | 61.0      |
| iRARL†              | 85.0        | 13.5          | 1.5          | 0.0           | 0.0            | 61.3      |

Table 8: **Zero-shot transfer performance in roundabout.** Each subtable stores results of different driving policies in the same traffic flow. A “†” indicates our proposed method.

| Evaluate in<br>IDM | Roundabout  |               |              |               |                |             |
|--------------------|-------------|---------------|--------------|---------------|----------------|-------------|
|                    | Success (↑) | Collision (↓) | Off Road (↓) | Off Route (↓) | Wrong Lane (↓) | Speed (↑)   |
| VRL/IDM            | 83.0        | 9.0           | 5.5          | 0.0           | 2.5            | 38.7        |
| VRL/FLOW           | 44.5        | 51.5          | <b>4.0</b>   | 1.0           | <b>0.0</b>     | 23.8        |
| VRL/CoPO           | 59.0        | 33.0          | 9.5          | <b>0.0</b>    | <b>0.0</b>     | 31.5        |
| eRARL              | 32.5        | <b>16.0</b>   | 55.5         | 6.0           | 0.5            | 19.7        |
| VRL/Ours†          | 40.5        | 30.5          | 31.0         | 0.5           | 1.0            | 21.1        |
| iRARL†             | <b>63.0</b> | 18.5          | 17.0         | <b>0.0</b>    | 1.5            | <b>32.3</b> |

  

| Evaluate in<br>FLOW | Roundabout  |               |              |               |                |             |
|---------------------|-------------|---------------|--------------|---------------|----------------|-------------|
|                     | Success (↑) | Collision (↓) | Off Road (↓) | Off Route (↓) | Wrong Lane (↓) | Speed (↑)   |
| VRL/IDM             | 54.0        | 27.0          | 18.5         | <b>0.0</b>    | 0.5            | 32.7        |
| VRL/FLOW            | 84.0        | 11.5          | 4.5          | 0.0           | 0.0            | 42.7        |
| VRL/CoPO            | 61.5        | 29.5          | 9.0          | <b>0.0</b>    | <b>0.0</b>     | 38.4        |
| eRARL               | 30.5        | <b>24.0</b>   | 46.0         | 5.0           | 0.5            | 17.7        |
| VRL/Ours†           | 66.5        | 25.5          | 9.5          | <b>0.0</b>    | <b>0.0</b>     | 38.6        |
| iRARL†              | <b>70.5</b> | 26.5          | <b>2.5</b>   | <b>0.0</b>    | 0.5            | <b>40.1</b> |

  

| Evaluate in<br>CoPO | Roundabout  |               |              |               |                |             |
|---------------------|-------------|---------------|--------------|---------------|----------------|-------------|
|                     | Success (↑) | Collision (↓) | Off Road (↓) | Off Route (↓) | Wrong Lane (↓) | Speed (↑)   |
| VRL/IDM             | 55.5        | 18.5          | 23.0         | 0.5           | 2.5            | 32.4        |
| VRL/FLOW            | 62.0        | <b>12.0</b>   | 24.0         | <b>0.0</b>    | 2.0            | 35.7        |
| VRL/CoPO            | 86.5        | 12.0          | 1.5          | 0.0           | 0.0            | 41.8        |
| eRARL               | 32.0        | 25.0          | 46.5         | 4.5           | <b>0.5</b>     | 17.2        |
| VRL/Ours†           | 70.0        | 26.5          | <b>3.5</b>   | <b>0.0</b>    | <b>0.5</b>     | 38.8        |
| iRARL†              | <b>76.5</b> | 17.5          | 5.5          | <b>0.0</b>    | <b>0.5</b>     | <b>39.9</b> |

  

| Evaluate in<br>FailMaker | Roundabout  |               |              |               |                |             |
|--------------------------|-------------|---------------|--------------|---------------|----------------|-------------|
|                          | Success (↑) | Collision (↓) | Off Road (↓) | Off Route (↓) | Wrong Lane (↓) | Speed (↑)   |
| VRL/IDM                  | 19.5        | 64.0          | 20.5         | <b>0.0</b>    | 0.5            | 20.2        |
| VRL/FLOW                 | <b>29.5</b> | <b>57.5</b>   | 14.0         | <b>0.0</b>    | <b>0.0</b>     | <b>25.0</b> |
| VRL/CoPO                 | 21.0        | 70.5          | <b>10.0</b>  | <b>0.0</b>    | 0.5            | 22.7        |
| eRARL                    | 29.5        | 17.0          | 51.5         | 5.0           | <b>0.0</b>     | 14.5        |
| VRL/Ours†                | 17.0        | 63.0          | 24.5         | <b>0.0</b>    | <b>0.0</b>     | 19.9        |
| iRARL†                   | 18.5        | <b>57.5</b>   | 25.5         | <b>0.0</b>    | <b>0.0</b>     | 20.5        |

  

| Evaluate in<br>Ours wo Adv | Roundabout  |               |              |               |                |             |
|----------------------------|-------------|---------------|--------------|---------------|----------------|-------------|
|                            | Success (↑) | Collision (↓) | Off Road (↓) | Off Route (↓) | Wrong Lane (↓) | Speed (↑)   |
| VRL/IDM                    | 75.5        | <b>9.5</b>    | 13.0         | <b>0.0</b>    | 2.0            | 38.0        |
| VRL/FLOW                   | 74.0        | 12.0          | 14.0         | <b>0.0</b>    | <b>0.0</b>     | 39.7        |
| VRL/CoPO                   | 82.0        | 13.5          | <b>1.5</b>   | 1.5           | 2.5            | 42.4        |
| eRARL                      | 30.0        | 16.5          | 54.5         | 5.0           | <b>0.0</b>     | 17.7        |
| VRL/Ours†                  | 87.5        | 9.0           | 3.5          | 0.0           | 0.0            | 43.2        |
| iRARL†                     | <b>86.0</b> | 12.0          | 2.0          | <b>0.0</b>    | <b>0.0</b>     | <b>42.8</b> |

  

| Evaluate in<br>Ours | Roundabout  |               |              |               |                |             |
|---------------------|-------------|---------------|--------------|---------------|----------------|-------------|
|                     | Success (↑) | Collision (↓) | Off Road (↓) | Off Route (↓) | Wrong Lane (↓) | Speed (↑)   |
| VRL/IDM             | 72.5        | 13.0          | 13.0         | <b>0.0</b>    | 1.5            | 37.8        |
| VRL/FLOW            | 81.0        | <b>4.0</b>    | 14.5         | 0.5           | <b>0.0</b>     | 41.2        |
| VRL/CoPO            | 80.5        | 17.5          | <b>1.5</b>   | 1.0           | <b>0.0</b>     | 42.2        |
| eRARL               | 31.0        | 15.5          | 56.0         | 4.5           | 0.5            | 18.2        |
| VRL/Ours†           | <b>84.5</b> | 11.5          | 5.0          | <b>0.0</b>    | <b>0.0</b>     | <b>42.3</b> |
| iRARL†              | 87.0        | 10.5          | 2.0          | 0.0           | 0.5            | 42.9        |
